# Supplementary material for: Potent Antifungal Properties of Dimeric Acylphloroglucinols from Hypericum mexicanum and Mechanism of Action of a Highly Active 3′Prenyl Uliginosin B
Source: MDPI journal article supplement (doi:10.3390/metabo10110459), 2020-11-13

**Figure S1: Characterization of Fraction I.** **A)** HPLC-MS analysis: the extracted chromatogram ( $\lambda$  240nm) of Fraction I shows that it is mainly composed of a single species. **B)** HPLC-UV analysis: UV spectrum of the main compound of Fraction I

**A)**

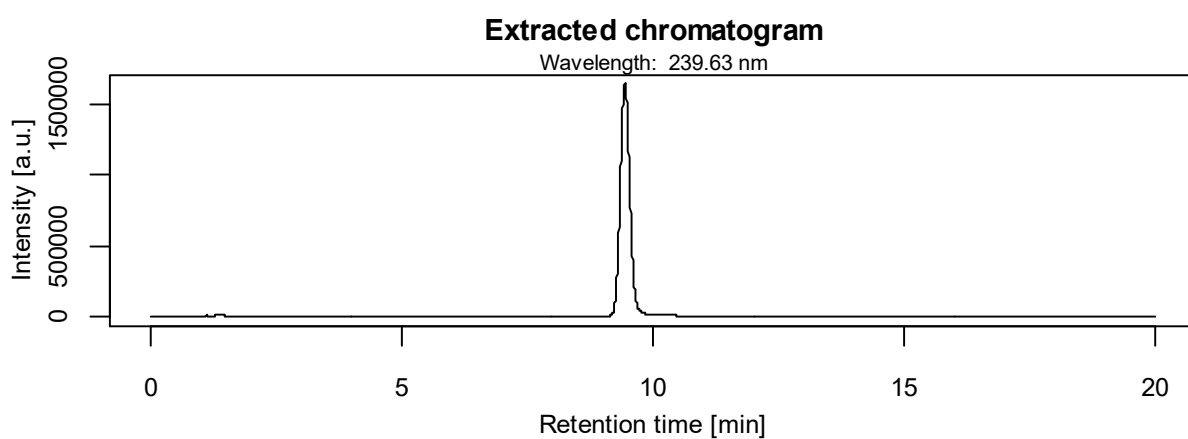

**B)**

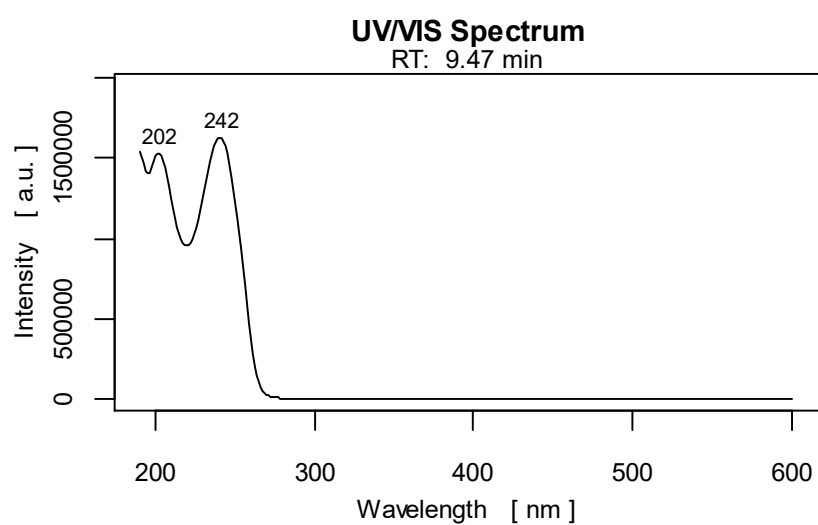

**Figure S2: Characterization of Fraction II** **A)** HPLC-MS analysis: the extracted chromatogram ( $\lambda$  280nm) of Fraction III-IV. **B)** HPLC-UV analysis: UV spectra of the main constituents of Fraction II.

**A)**

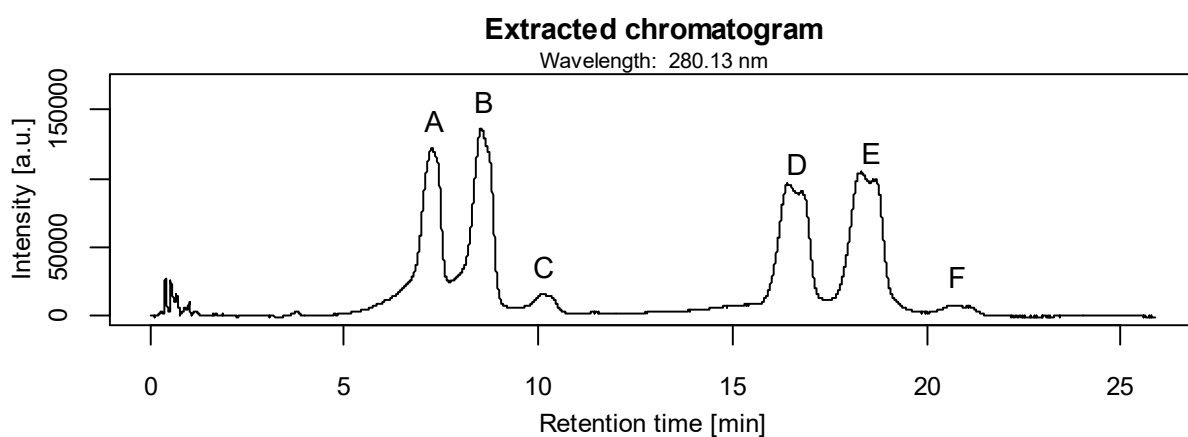

**B)**

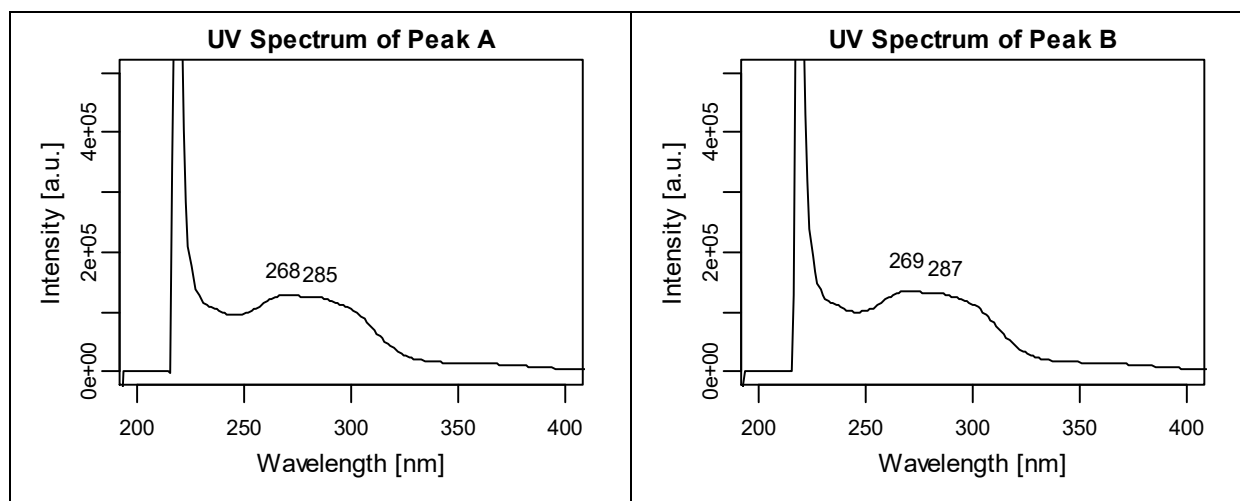

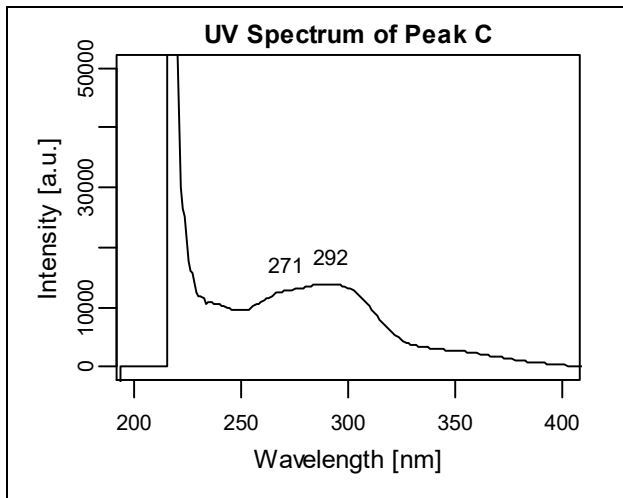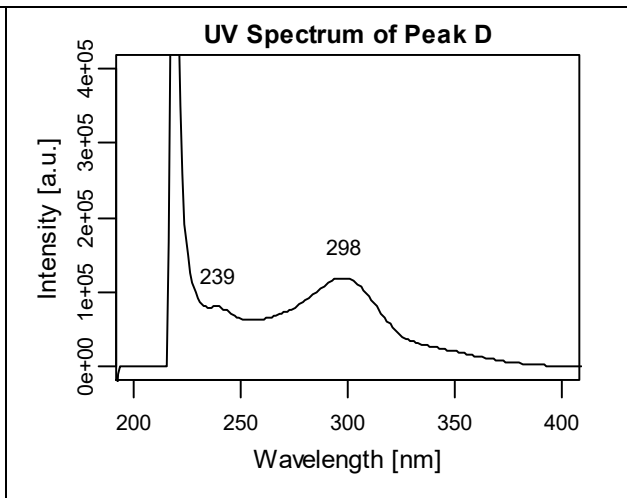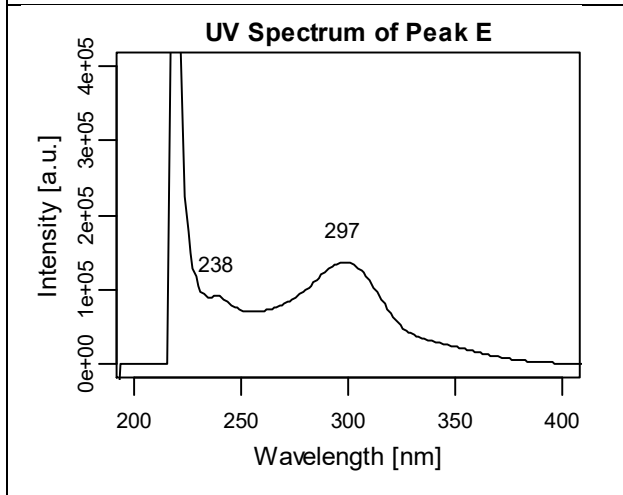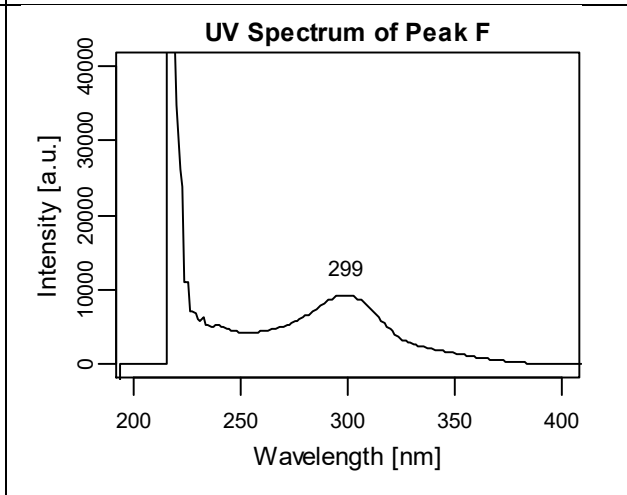

Supplement: s1 [file s1]
