# Supplementary material for: Potent Antifungal Properties of Dimeric Acylphloroglucinols from Hypericum mexicanum and Mechanism of Action of a Highly Active 3′Prenyl Uliginosin B
Source: MDPI journal article supplement (doi:10.3390/metabo10110459), 2020-11-13
Supplement: s1 [file s1]

**Table S1: Aantifungal activity of *H. mexicanum* crude extract**

| Fungal strain               | MIC <sub>50</sub> (µg/ml)* | MIC <sub>50</sub> mean (µg/ml)** |
|-----------------------------|----------------------------|----------------------------------|
| <i>S. cerevisiae</i> SGU421 | 16 ± 0,03                  | 44,72                            |
| <i>S. cerevisiae</i> BB1533 | 125 ± 0,16                 |                                  |
| <i>C. albicans</i> YN5      | 236± 0,21                  | 63,5                             |
| <i>C. albicans</i> YN7      | 64± 0,04                   |                                  |
| <i>C. albicans</i> YL1      | 32± 0,01                   |                                  |

\*Data are expressed as the mean ± standad deviation of three independent measurements

\*\*Data are expressed as geometric mean

**Table S2: Anti-*Candida* activity of *H. mexicanum* extracts**

| Strain                          | Chloroform | Methanol |
|---------------------------------|------------|----------|
| <i>C. albicans</i> YN5          | 32         | 64       |
| <i>C. albicans</i> YN7          | 32         | 64       |
| <i>C. albicans</i> YD7          | 32         | <125     |
| <i>C. albicans</i> YD8          | 16         | <125     |
| <i>C. parapsilosis</i> YV1      | >16        | <125     |
| <i>C. parapsilosis</i> YV2      | 32         | <125     |
| <i>C. glabrata</i> MFB 005-4    | >16        | 16       |
| <i>C. glabrata</i> MFB 004-1    | 16         | 125      |
| <i>C. lusitaniae</i> MFB0037-1  | 16         | 32       |
| <i>C. lusitaniae</i> MFB 0022-1 | >16        | 32       |
| <i>C. tropicalis</i> MFB0035-1  | 16         | <125     |
| <i>C. pararugosa</i> MFB 007-3  | 32         | <125     |
| <i>C. deformans</i> MFB 037-1   | 32         | <125     |

\*Data are expressed as the mean ± standad deviation of three independent measurements

**Table S3: Antifungal activity of isolated compounds**

| Strain                        | Compound 1<br>MIC <sub>50</sub> (µM) | Compound 2 | Compound 3 | Compound 4 | Compound 5 |
|-------------------------------|--------------------------------------|------------|------------|------------|------------|
| <i>C. albicans</i> MFB008 MM1 | 6±0.23                               | 8±0.91     | 4±0.32     | 3±0.16     | 3±0.14     |
| <i>C. albicans</i> YMS 102-2  | 8±0.71                               | 8±0.93     | 4±0.35     | 4±0.28     | 4±0.23     |
| <i>C. glabrata</i> MFB004     | 16± 1.14                             | 32±1.73    | 6±0.23     | 4±0.11     | 3±0.19     |
| <i>C. glabrata</i> MFB005FS4  | 8±0.43                               | 8±1.26     | 10±0.82    | 6±0.13     | 3±0.14     |

MIC<sub>50</sub> values are expressed as means ± standard deviation of three independent experiments.

**Table S4: Top twenty sensitive and resistant deletion mutants**

| GENES                    | LogFC | PValue | CHR | DESCRIPTION                                                                                                                                                                                                                                                                                                                                                                                         |
|--------------------------|-------|--------|-----|-----------------------------------------------------------------------------------------------------------------------------------------------------------------------------------------------------------------------------------------------------------------------------------------------------------------------------------------------------------------------------------------------------|
| <b>Sensitive Mutants</b> |       |        |     |                                                                                                                                                                                                                                                                                                                                                                                                     |
| CCT5                     | -3.4  | 0.003  | 10  | Subunit of the cytosolic chaperonin Cct ring complex; related to Tcp1p, required for the assembly of actin and tubulins in vivo                                                                                                                                                                                                                                                                     |
| YPR053C                  | -3.2  | 0.008  | 16  | Putative protein of unknown function; conserved among <i>S. cerevisiae</i> strains; YPR053C is not an essential gene; partially overlaps verified ORF NHP6A/YPR052C                                                                                                                                                                                                                                 |
| YKR040C                  | -3.1  | 0.001  | 11  | Dubious open reading frame; unlikely to encode a functional protein, based on available experimental and comparative sequence data; partially overlaps the uncharacterized ORF YKR041W                                                                                                                                                                                                              |
| PDX3                     | -3.1  | 0.004  | 2   | Pyridoxine (pyridoxamine) phosphate oxidase; has homologs in <i>E. coli</i> and <i>Myxococcus xanthus</i> ; transcription is under the general control of nitrogen metabolism                                                                                                                                                                                                                       |
| TDA9                     | -3.0  | 0.027  | 13  | Transcription factor that regulates acetate production; green fluorescent protein (GFP)-fusion protein localizes to the nucleus; null mutant is sensitive to expression of the top1-T722A allele; not an essential gene; TDA9 has a paralog, RSF2, that arose from the whole genome duplication                                                                                                     |
| YPR096C                  | -3.0  | 0.016  | 16  | Protein of unknown function; may interact with ribosomes, based on co-purification experiments                                                                                                                                                                                                                                                                                                      |
| TSL1                     | -3.0  | 0.016  | 13  | Large subunit of trehalose 6-phosphate synthase/phosphatase complex; Tps1p-Tps2p complex converts uridine-5'-diphosphoglucose and glucose 6-phosphate to trehalose; contributes to survival to acute lethal heat stress; mutant has aneuploidy tolerance; protein abundance increases in response to DNA replication stress; TSL1 has a paralog, TPS3, that arose from the whole genome duplication |
| SCT1                     | -3.0  | 0.016  | 2   | Glycerol 3-phosphate/dihydroxyacetone phosphate sn-1 acyltransferase; dual substrate-specific acyltransferase of the glycerolipid biosynthesis pathway; prefers 16-carbon fatty acids; similar to Gpt2p; gene is constitutively transcribed                                                                                                                                                         |
| MTC7                     | -2.9  | 0.006  | 5   | Protein of unknown function; predicted metabolic role based on network analysis derived from ChIP experiments, a large-scale deletion study and localization of transcription factor binding sites; null mutant is sensitive to temperature oscillation in a cdc13-1 mutant                                                                                                                         |
| GSP1                     | -2.8  | 0.002  | 12  | Ran GTPase; GTP binding protein (mammalian Ranp homolog) involved in the maintenance of nuclear organization, RNA processing and transport; regulated by Srm1p, Rna1p, Yrb1p, Yrb2p, Yrp4p, Yrb30p, Cse1p and Kap95p; GSP1 has a paralog, GSP2, that arose from the whole genome duplication                                                                                                        |
| GGA1                     | -2.7  | 0.010  | 4   | Golgi-localized protein with homology to gamma-adaptin; interacts with and regulates Arf1p and Arf2p in a GTP-dependent manner in order to facilitate traffic through the late Golgi; GGA1 has a paralog, GGA2, that arose from the whole genome duplication                                                                                                                                        |
| RPL41B                   | -2.7  | 0.011  | 4   | Ribosomal 60S subunit protein L41B; comprises only 25 amino acids; rpl41a rpl41b double null mutant is viable; homologous to mammalian ribosomal protein L41, no bacterial homolog; RPL41B has a paralog, RPL41A, that arose from the whole genome duplication                                                                                                                                      |
| FAR10                    | -2.7  | 0.083  | 12  | Protein involved in recovery from arrest in response to pheromone; acts in a cell cycle arrest recovery pathway independent from Far1p; interacts with Far3p, Far7p, Far8p, Far9p, and Far11p; potential Cdc28p substrate; FAR10 has a paralog, VPS64, that arose from the whole genome duplication                                                                                                 |

|       |      |       |    |                                                                                                                                                                                                                                                                                                                                                                                                                                                                                                 |
|-------|------|-------|----|-------------------------------------------------------------------------------------------------------------------------------------------------------------------------------------------------------------------------------------------------------------------------------------------------------------------------------------------------------------------------------------------------------------------------------------------------------------------------------------------------|
| HUL4  | -2.7 | 0.015 | 10 | Protein with similarity to hect domain E3 ubiquitin-protein ligases; not essential for viability; found in association with Trf4 in TRAMP complex                                                                                                                                                                                                                                                                                                                                               |
| TLG1  | -2.6 | 0.032 | 4  | Essential t-SNARE that mediates fusion of vesicles with the late Golgi; forms a complex with Tlg2p and Vti1p; mediates fusion of endosome-derived vesicles with the late Golgi; binds the docking complex VFT (Vps fifty-three) through interaction with Vps51p                                                                                                                                                                                                                                 |
| MAP1  | -2.6 | 0.000 | 12 | Methionine aminopeptidase; catalyzes the cotranslational removal of N-terminal methionine from nascent polypeptides; function is partially redundant with that of Map2p                                                                                                                                                                                                                                                                                                                         |
| ERG29 | -2.5 | 0.003 | 13 | Protein of unknown function involved in ergosterol biosynthesis; conditional mutants produce less ergosterol, display impaired oxygen consumption, respiratory growth, mitochondrial iron utilization, and are more sensitive to oxidative stress; mutant bm-8 has a growth defect on iron-limited medium that is complemented by overexpression of Yfh1p; protein localizes to the cytoplasm, ER and nuclear envelope; highly conserved in ascomycetes                                         |
| SNT1  | -2.5 | 0.082 | 3  | Subunit of the Set3C deacetylase complex; interacts directly with the Set3C subunit, Sif2p; putative DNA-binding protein; mutant has increased aneuploidy tolerance; relocates to the cytosol in response to hypoxia                                                                                                                                                                                                                                                                            |
| NPL4  | -2.5 | 0.065 | 2  | Substrate-recruiting cofactor of the Cdc48p-Npl4p-Ufd1p segregase; assists Cdc48p in the dislocation of misfolded, polyubiquitinated ERAD substrates that are subsequently delivered to the proteasome for degradation; also involved in the regulated destruction of resident ER membrane proteins, such as HMG-CoA reductase (Hmg1/2p) and cytoplasmic proteins (Fbp1p); role in mobilizing membrane bound transcription factors by regulated ubiquitin/proteasome-dependent processing (RUP) |
| AKR1  | -2.5 | 0.019 | 4  | Palmitoyl transferase involved in protein palmitoylation; acts as a negative regulator of pheromone response pathway; required for endocytosis of pheromone receptors; involved in cell shape control; contains ankyrin repeats; AKR1 has a paralog, AKR2, that arose from the whole genome duplication; any of several human homologs encoding DHHC-type zinc fingers (ZDHHC) can complement temperature sensitivity of yeast akr1 null mutant                                                 |

#### Resistant Mutants

|       |     |       |    |                                                                                                                                                                                                                                                                                                       |
|-------|-----|-------|----|-------------------------------------------------------------------------------------------------------------------------------------------------------------------------------------------------------------------------------------------------------------------------------------------------------|
| IOC2  | 4.1 | 0.001 | 12 | Subunit of the Isw1b complex; exhibits nucleosome-stimulated ATPase activity and acts within coding regions to coordinate transcription elongation with termination and processing; contains a PHD finger motif; other complex members are Isw1p and Ioc4p                                            |
| NOP6  | 3.5 | 0.033 | 4  | rRNA-binding protein required for 40S ribosomal subunit biogenesis; contains an RNA recognition motif (RRM); hydrophilin essential to overcome the stress of the desiccation-rehydration process; NOP6 may be a fungal-specific gene as no homologs have been yet identified in higher eukaryotes     |
| PMP1  | 3.3 | 0.044 | 3  | Regulatory subunit for the plasma membrane H(+)-ATPase Pma1p; small single-membrane span proteolipid; forms unique helix and positively charged cytoplasmic domain that is able to specifically segregate phosphatidylserines; PMP1 has a paralog, PMP2, that arose from the whole genome duplication |
| RPC10 | 3.2 | 0.002 | 8  | RNA polymerase subunit ABC10-alpha, found in RNA pol I, II, and III; relocates from nucleolus to cytoplasm upon DNA replication stress                                                                                                                                                                |
| RMD5  | 3.1 | 0.030 | 4  | Component of GID Complex that confers ubiquitin ligase (U3) activity; necessary for polyubiquitination and degradation of the gluconeogenic enzyme fructose-1,6-bisphosphatase; forms dimer with Fyv10p that is then                                                                                  |

|         |     |       |    |                                                                                                                                                                                                                                                                                                                                                                                                                                                                          |
|---------|-----|-------|----|--------------------------------------------------------------------------------------------------------------------------------------------------------------------------------------------------------------------------------------------------------------------------------------------------------------------------------------------------------------------------------------------------------------------------------------------------------------------------|
|         |     |       |    | recruited to GID Complex by Gid8p; also required for sporulation; conserved protein that has a degenerate RING finger domain                                                                                                                                                                                                                                                                                                                                             |
| SSH1    | 3.0 | 0.012 | 2  | Subunit of the Ssh1 translocon complex; Sec61p homolog involved in co-translational pathway of protein translocation; not essential                                                                                                                                                                                                                                                                                                                                      |
| CTA1    | 3.0 | 0.012 | 4  | Catalase A; breaks down hydrogen peroxide in the peroxisomal matrix formed by acyl-CoA oxidase (Pox1p) during fatty acid beta-oxidation                                                                                                                                                                                                                                                                                                                                  |
| YML079W | 2.9 | 0.026 | 13 | Non-essential protein of unknown function; has structural resemblance to plant storage and ligand binding proteins (canavalin, glycinin, auxin binding protein) and to some enzymes (epimerase, germin); localizes to the nucleus and cytoplasm                                                                                                                                                                                                                          |
| THG1    | 2.9 | 0.006 | 7  | tRNAHis guanylyltransferase; adds a guanosine residue to the 5' end of tRNAH is after transcription and RNase P cleavage; can also catalyze reverse (3'-5') polymerization with certain substrates in a template-dependent reaction; couples nuclear division and migration to cell budding and cytokinesis; essential enzyme conserved among eukaryotes                                                                                                                 |
| MUB1    | 2.7 | 0.020 | 13 | MYND domain-containing protein; component of the Mub1p-Ubr2p-Rad6p ubiquitin ligase complex, required for ubiquitination and degradation of Rpn4p; interacts with Ubr2p (E3) and indirectly with Rad6p (E2); short-lived protein degraded in a Ubr2p/Rad6p dependent manner; proposed to function as both a partner and substrate of the Ubr2p/Rad6p ubiquitin ligase; similar to the A. nidulans samB gene                                                              |
| RCF1    | 2.6 | 0.070 | 13 | Cytochrome c oxidase subunit; required for assembly of the Complex III-Complex IV supercomplex, and for assembly of Cox13p and Rcf2p into cytochrome c oxidase; similar to Rcf2p, and either Rcf1p or Rcf2p is required for late-stage assembly of the Cox12p and Cox13p subunits and for cytochrome c oxidase activity; required for growth under hypoxic conditions; member of the hypoxia induced gene family; C. elegans and human orthologs are functional in yeast |
| YDL206W | 2.6 | 0.040 | 4  | Putative protein of unknown function; YDL206W is not an essential protein                                                                                                                                                                                                                                                                                                                                                                                                |
| YJR087W | 2.5 | 0.005 | 10 | Dubious open reading frame; unlikely to encode a functional protein, based on available experimental and comparative sequence data; not conserved in closely related Saccharomyces species; partially overlaps the verified genes STE18 and ECM2                                                                                                                                                                                                                         |
| IZH1    | 2.5 | 0.047 | 4  | Membrane protein involved in zinc ion homeostasis; member of the four-protein IZH family; transcription is regulated directly by Zap1p, expression induced by zinc deficiency and fatty acids; deletion increases sensitivity to elevated zinc; IZH1 has a paralog, IZH4, that arose from the whole genome duplication                                                                                                                                                   |
| DUS1    | 2.4 | 0.029 | 13 | Dihydrouridine synthase; member of a widespread family of conserved proteins including Smm1p, Dus3p, and Dus4p; modifies pre-tRNA(Phe) at U17                                                                                                                                                                                                                                                                                                                            |
| POR2    | 2.4 | 0.002 | 9  | Putative mitochondrial porin (voltage-dependent anion channel); not required for mitochondrial membrane permeability or mitochondrial osmotic stability; POR2 has a paralog, POR1, that arose from the whole genome duplication                                                                                                                                                                                                                                          |
| ABM1    | 2.3 | 0.009 | 10 | Protein of unknown function; required for normal microtubule organization                                                                                                                                                                                                                                                                                                                                                                                                |
| YNL011C | 2.2 | 0.007 | 14 | Putative protein of unknown function; YNL011C is not an essential gene                                                                                                                                                                                                                                                                                                                                                                                                   |
| YNL095C | 2.2 | 0.005 | 14 | Putative protein of unknown function; predicted to contain a transmembrane domain; not an essential gene; YNL095C has a paralog, ECM3, that arose from the whole genome duplication                                                                                                                                                                                                                                                                                      |

|      |     |       |   |                                                                                                                              |
|------|-----|-------|---|------------------------------------------------------------------------------------------------------------------------------|
| NEL1 | 2.2 | 0.277 | 8 | Activator of Sar1p GTPase activity; paralog of Sec23 but does not associate with the COPII components; not an essential gene |
|------|-----|-------|---|------------------------------------------------------------------------------------------------------------------------------|

---

**Table S5. Complete list of primer sequences**

| oligoname      | Sequence 5' - 3'                                                                 |
|----------------|----------------------------------------------------------------------------------|
| UPTAG Index 1  | ACG CTC TTC CGA TCT ATACC GTC CAC GAG GTC TCT                                    |
| UPTAG Index 2  | ACG CTC TTC CGA TCT TCTAG GTC CAC GAG GTC TCT                                    |
| IUPTAG Index 3 | ACG CTC TTC CGA TCT GCAGC GTC CAC GAG GTC TCT                                    |
| UPTAG Index 4  | ACG CTC TTC CGA TCT CCGAG GTC CAC GAG GTC TCT                                    |
| DNTAG Index 1  | ACG CTC TTC CGA TCT ATACC GTG TCG GTC TCG TAG                                    |
| DNTAG Index 2  | ACG CTC TTC CGA TCT TCTAG GTG TCG GTC TCG TAG                                    |
| DNTAG Index 3  | ACG CTC TTC CGA TCT GCAGC GTG TCG GTC TCG TAG                                    |
| DNTAG Index 4  | ACG CTC TTC CGA TCT CCGAG GTG TCG GTC TCG TAG                                    |
| UPTAG_Index_5  | ACG CTC TTC CGA TCT AAGAT GTC CAC GAG GTC TCT                                    |
| UPTAG_Index_6  | ACG CTC TTC CGA TCT TAGTA GTC CAC GAG GTC TCT                                    |
| UPTAG_Index_7  | ACG CTC TTC CGA TCT GAACT GTC CAC GAG GTC TCT                                    |
| UPTAG_Index_8  | ACG CTC TTC CGA TCT CAATG GTC CAC GAG GTC TCT                                    |
| DNTAG_Index_5  | ACG CTC TTC CGA TCT AAGAT GTG TCG GTC TCG TAG                                    |
| DNTAG_Index_6  | ACG CTC TTC CGA TCT TAGTA GTG TCG GTC TCG TAG                                    |
| DNTAG_Index_7  | ACG CTC TTC CGA TCT GAACT GTG TCG GTC TCG TAG                                    |
| DNTAG_Index_8  | ACG CTC TTC CGA TCT CAATG GTG TCG GTC TCG TAG                                    |
| UPkanMX        | CAA GCA GAA GAC GGC ATA CGA GAT GTC GAC CTG CAG CGT ACG                          |
| DNkanMX        | CAA GCA GAA GAC GGC ATA CGA GAT ACG AGC TCG AAT TCA TCG                          |
| P5             | A ATG ATA CGG CGA CCA CCG AGA TCT ACA CTC TTT CCC TAC ACG ACG CTC TTC<br>CGA TCT |
